# Supplementary material for: Comparative transcript profiling of alloplasmic male-sterile lines revealed altered gene expression related to pollen development in rice (Oryza sativa L.)
Source: PubMed Central journal article supplement (PMC4974769; doi:10.1186/s12870-016-0864-7), 2016-08-05
Supplement: 12870_2016_864_MOESM6_ESM.pdf [file 12870_2016_864_MOESM6_ESM.pdf]

A

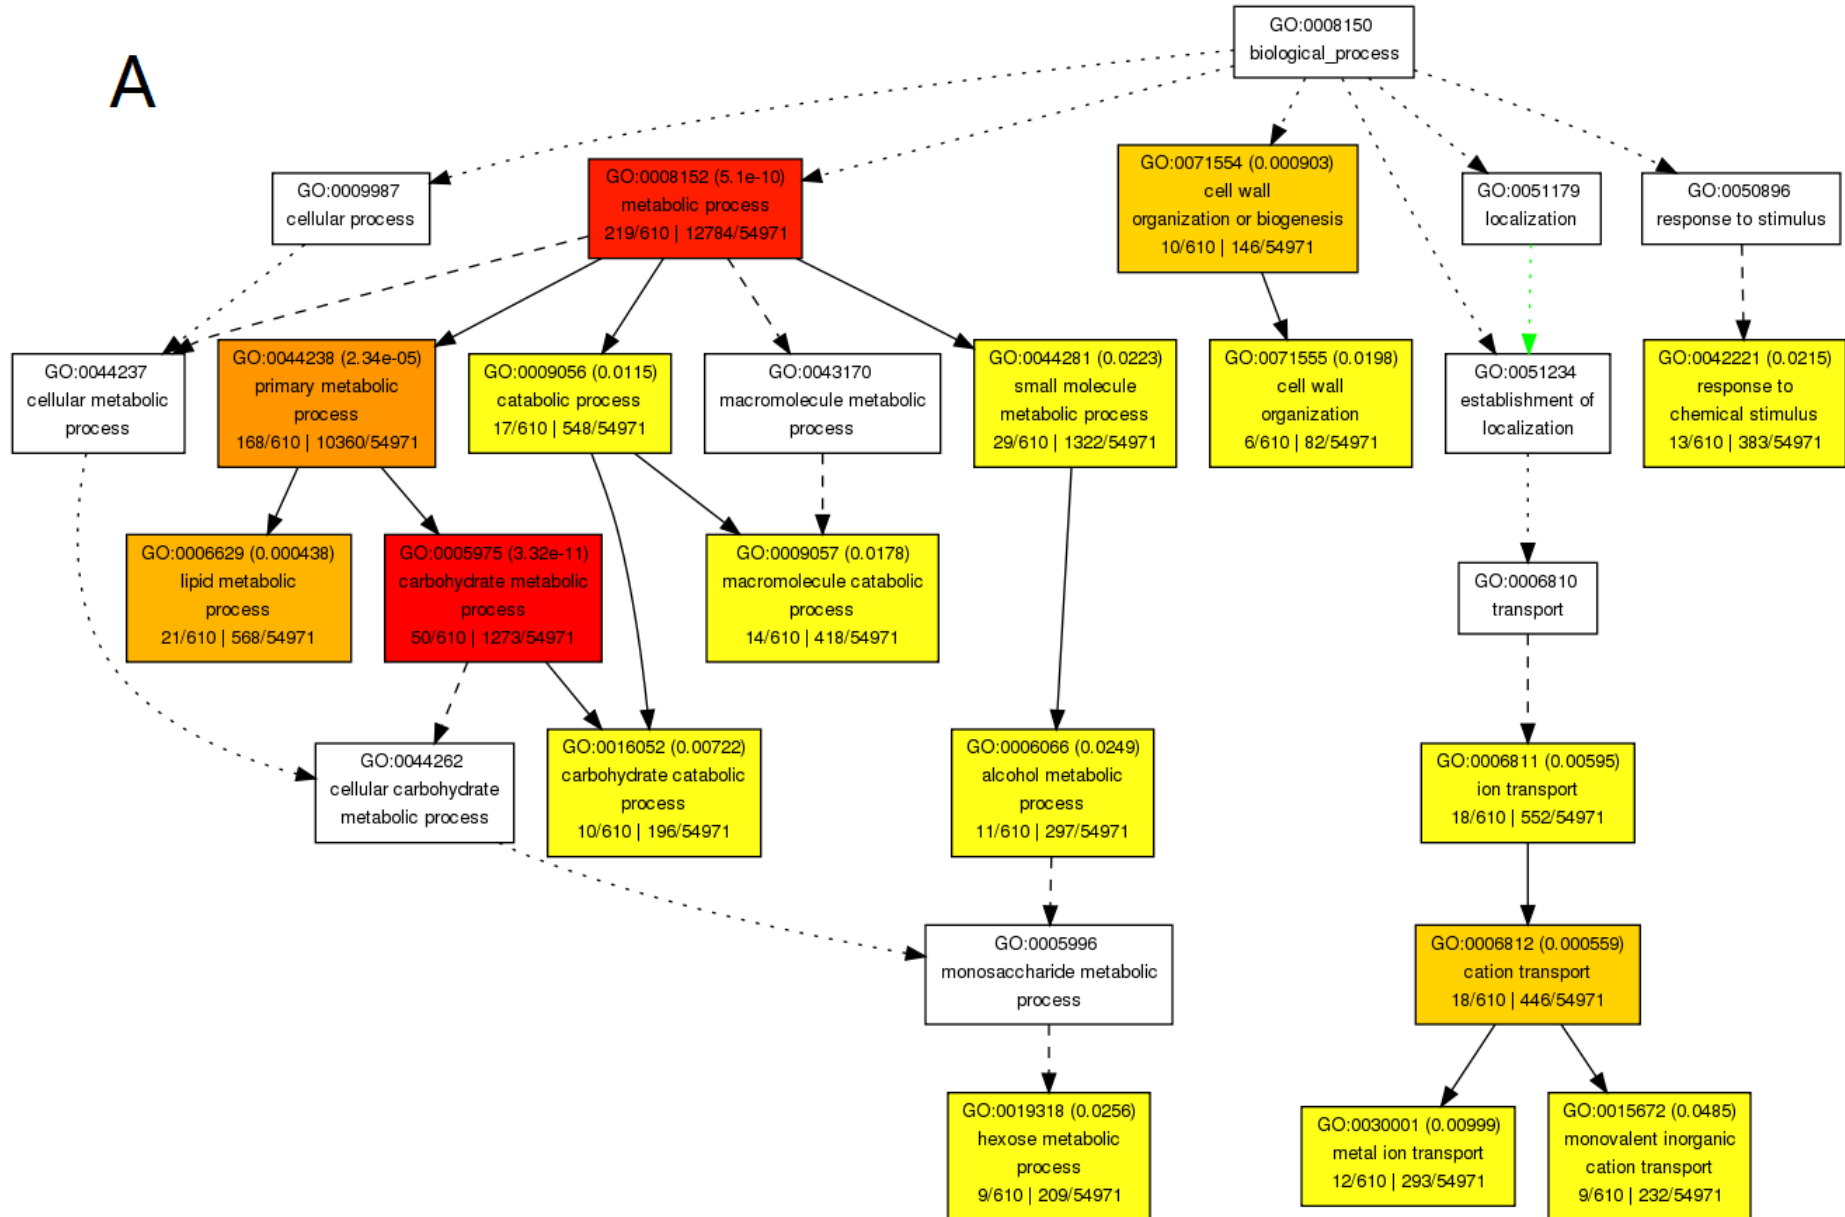

Fig. S4.

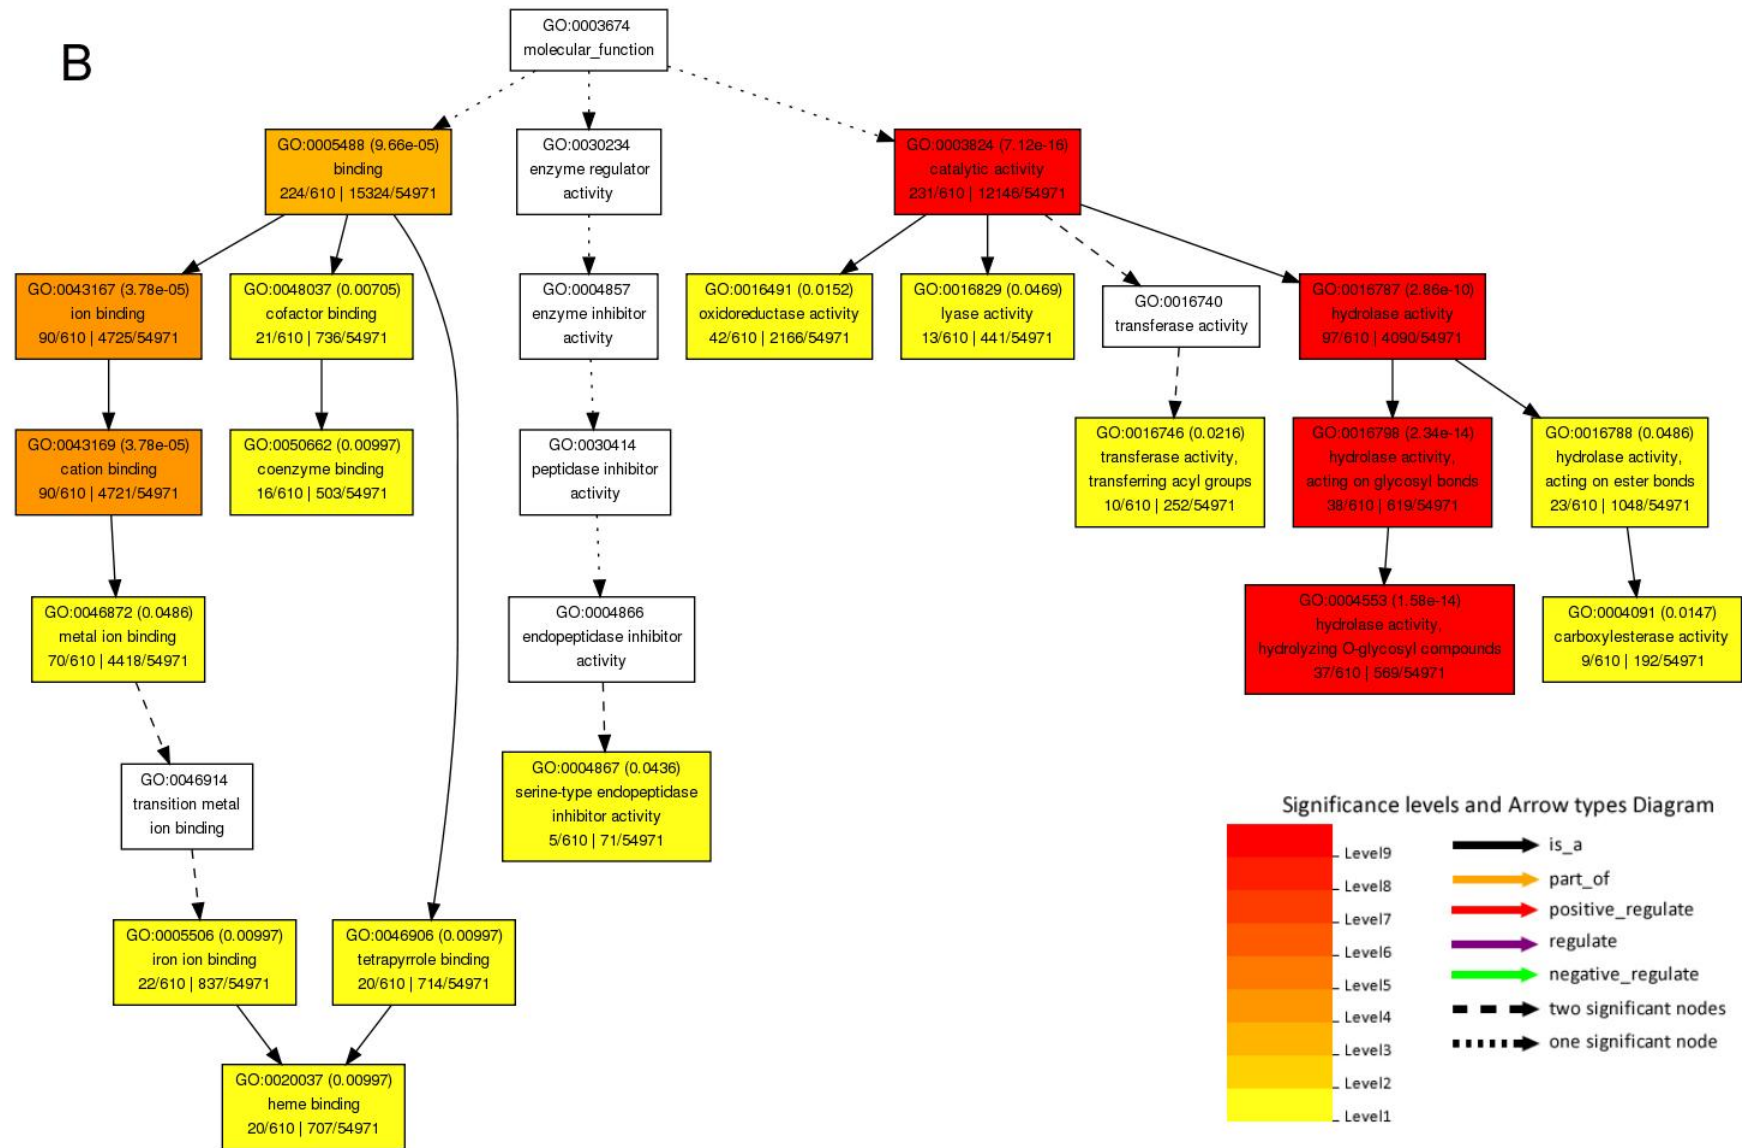

**Fig. S4.** GO analysis of the 622 DEGs in the three CMS lines. (A) GO enrichment of biological process; (B) GO enrichment of Molecular function.
